# Supplementary material for: Impacts of sewage irrigation on soil properties of farmland in China: A review
Source: Copernicus journal article supplement (doi:10.5194/se-2017-116), 2017-11-06
Supplement: Supplementary file [file se-2017-116-AC3-supplement.pdf]

# Impacts of sewage irrigation on soil properties of a farmland in China: A review

Qiangkun Li<sup>1</sup> Jiao Tang<sup>2</sup> Tian Wang<sup>3</sup> Dafu Wu<sup>2\*</sup> Carlos Alberto Busso<sup>4</sup> Ruifeng Jiao<sup>2</sup> Xiujuan Ren<sup>2</sup>

<sup>1</sup>Yellow River Institute of Hydraulic Research, Yellow River Conservancy Commission, Zhengzhou, 450003, China;

<sup>2</sup>School of Resource and Environment, Henan Institute of Science and Technology, Xinxiang, 453003, China;

<sup>3</sup>Third Institute of Geo-exploration Institute, Henan Bureau of Geo-Exploration & Mineral Development, Zhengzhou, 451464, China;

<sup>4</sup>Departamento de Agronomía-CERZOS (CONICET: Consejo Nacional de Investigaciones Científicas y Técnicas de la República Argentina), Universidad Nacional del Sur, San Andrés 800, 8000 Bahía Blanca, Argentina;

Correspondence to: Dafu Wu (uau9393@163.com)

**Abstract:** Fresh water is a valuable nonrenewable resource and plays an important role in maintaining economic and social development. Considering its large population and consumption potential, water resources deficit will certainly impede basic industries a sustainable development in China in the near future. Application of sewage irrigation, to some extent, was regarded as an alternative way to solve the problem of agricultural irrigation water shortage in some areas (such as North China). However, accompanied with an extensive implementation of sewage irrigation, some problems on sewage irrigation in agriculture are gradually obvious, especially serious pollution and destruction of farmlands. In this paper, the effects of sewage irrigation on soil physical (soil bulk density, soil resistance to penetration and field capacity), chemical (pH, soil organic matter, nitrogen, phosphorus, potassium, heavy metal and organic pollutants) and biological characteristics (soil microorganism and enzyme activities) of farmlands in China were systematically reviewed on the base of the current utilization status of China's farmland sewage irrigation. Some feasible suggestions were put forward to the development prospects in the future. This review will be beneficial for promoting a healthy development of sewage irrigation and providing a theoretical support for reclamation and a high efficiency use of effluents in China.

**Keywords:** wastewater irrigation, soil characteristics, agriculture, pollution, China

## 35 Introduction

36

37 Water is not only a valuable natural resource that maintains people's survival and development, but  
38 also constitutes the main constituent element of the environment (Bouwer, 1994; Gu et al., 2017; Molles,  
39 2008; Piao et al., 2010). China is rich in the volume of total water resources. In this country, the total  
40 amount of fresh water resources could reach  $2.81 \times 10^{12} \text{ m}^3$  which account for about 6% of the global  
41 water resources (Thomas, 2008; Zhang and Wang, 2007). However, the per-capita water resource  
42 volume is relatively limited (i.e.,  $2.3 \times 10^3 \text{ m}^3$ ), considering the large population of China. It only  
43 represents 25 % of the world average level, becoming thus one of the poorest countries of water  
44 resources per capita (Fatta-Kassinos et al., 2011; JR, 1991; Wang et al., 2008). Even worse, the regional  
45 water resource characteristics and seasonal distribution in China constrain the sustainable development  
46 of economic and social development in water shortage areas (Piao et al., 2010).

47 As a vast agricultural country, extensive quantities of water are consumed in China's agricultural  
48 production. Irrigation water accounts for more than 70% of the total water consumption (Qadir et al.,  
49 2010; Shi et al., 2014; Yang, 2000). At present, there are about 50% of the total cultivated land that  
50 could be irrigated. This non-irrigated land currently produces about 75% of the nation grain output,  
51 more than 80% of cotton, and more than 90% percent of vegetables (Jin and Young, 2001a; Liu and Xu,  
52 2002; Zeng and Zhu, 2004). With the rapid development of the national economy and the continuous  
53 improvement of people's quality of life, industrial and domestic water consumption increase  
54 continuously. This reduces the water available with agricultural purposes. In addition irrigation water is  
55 not guaranteed, and water shortage is becoming increasingly serious as result (Bouwer, 1994; Brown  
56 and Halweil, 1998; Vörösmarty et al., 2000). In China, agricultural water shortage per year is about  $3.0$   
57  $\times 10^{10} \text{ m}^3$ , determining a reduction in grain yield of  $2.5\text{-}4.0 \times 10^{10} \text{ kg}$  (Brown, 1995; Wang et al., 2010;  
58 Zhou, 2002). At the same time, the total amount of water discharged as waste from industrial and urban  
59 areas is increasing. This waste water is relatively concentrated, and it is not affected neither by seasonal  
60 changes nor floodings. Most of the untreated waste water is poured directly into rivers, lakes and  
61 reservoirs, which determines a potential threat to the ecological environment (Qadir et al., 2010; Rusan  
62 et al., 2007).

63 Water resource depletion in agriculture results in that large amounts of sewage are used for irrigation  
64 on a global scale. Nearly  $2.0 \times 10^5 \text{ km}^2$ , involving 50 countries, are irrigated by sewage (Abaidoo et al.,  
65 2010; Qadir et al., 2007; Wallach et al., 2005). There were  $4.3 \times 10^{10} \text{ km}^2$  of irrigated farmland  
66 worldwide by the end of 2009. This accounted for 7.3% of the total irrigated area in China (Fang, 2011).  
67 Sewage irrigation shows a rising trend, especially in northern China since it is the main area of water  
68 shortage. Application of sewage could solve the problem of water shortage for agricultural irrigation in  
69 this area (Qadir et al., 2010; Rusan et al., 2007). There are reports that sewage irrigation is currently  
70 focused on the Haihe, Liaohe, Yellow and Huaihe river basins, which represent about 85% of the area  
71 irrigated by sewage (Liu and Xu, 2002). In developed countries, the techniques of sewage treatment and  
72 reutilization have improve enough as to achieve the dual purposes of water conservation and pollution  
73 control (Angelakis et al., 1999; Fatta-Kassinou et al., 2011; Wallach et al., 2005). However, the sewage  
74 treatment techniques have lag behind in China and water quality will not reach good enough standards  
75 for a long time. Even worse, management of sewage irrigation and monitoring systems have been not  
76 appropriate (Fang, 2011). More attention was paid to determine it long-term sewage irrigation either  
77 affected or not the soil properties of farmlands in China (Khan et al., 2008; Liu et al., 2005; Meng et al.,  
78 2016; Tang et al., 2004).

79 This paper reviews the effects of sewage irrigation on soil physical, chemical and biological  
80 characteristics of farmlands in China, putting forward suggestions for the development of perspectives  
81 in the near future. This specific objective seek to (1) promote the sustainable development of sewage  
82 irrigation in China, and (2) provide a theoretical support for the high efficiency of sewage in  
83 reclamation programs.

84

## 85 **1. History of sewage irrigation**

86 Commonly, production is not the result of using domestic sewage directly. Engineering is needed to  
87 obtain effluents after applying appropriate treatments that will meet the irrigation quality requirements  
88 for (1) irrigating farmlands and grassland landscapes, and (2) contributing to the groundwater recharge,  
89 solving the lack of water resources and achieving eventually sewage reclamation (Liu and Xu, 2002;  
90 Qadir et al., 2010; Xia and Wang, 2001). Many developed countries in the world have realized quite

91 early on the strategic significance of sewage reutilization. Western European countries began to use  
92 sewage to irrigate farmlands since the middle of the 16th century. Germany is considered to have the  
93 world's largest and oldest sewage irrigation sites. In this country approximately 100 km<sup>2</sup> of marginal  
94 and low-productivity land have been irrigated by sewage since 1928 (Hass et al., 2012; Lottermoser,  
95 2012). The first country which made large-scale utilization of sewage irrigation was the U.S.A, where a  
96 suitable water purification system was assembled in 1920; some research and intensive utilization of  
97 sewage irrigation was conducted in this country (Chen et al., 2000; Sabol et al., 1987). To date, its  
98 wastewater treatment technology and application scope keep a leading place in the world. Japan has  
99 begun to recycling sewage and implemented rural sewage treatment projects since the 1960's.  
100 Approximately in the year 2000, small sewage treatment plants were implemented on a national scale,  
101 depending on small sewage treatment systems for agricultural irrigation in the 1970's (Francks, 1979;  
102 Morishita, 1988). As one of the most severely water-deficient countries in the world, Israel has  
103 established a comprehensive sewage system and sewage treatment projects in all its cities and  
104 settlements (Chen and Zhou, 2001; Heukelekian, 1957; Jueschke et al., 2008). Almost all of its  
105 wastewater was effectively processed and utilized (Wallach et al., 2005). More than 57% of the sewage  
106 after purification has been used for irrigation in agriculture, gardens and lawns. This accounts for about  
107 20% of the total irrigation water. This made Israel a very efficient water utilization country (Chen and  
108 Zhou, 2001). Other countries, such as Tunisia, India, Jordan and Mexico, have also conducted relevant  
109 research on wastewater irrigation, and already accumulated a wealth of experience (Abu-Sharar et al.,  
110 2010; Bouri et al., 2008; Siebe and Fischer, 1996; Singh et al., 2012).

111 For sewage irrigation safety, different countries and international organizations have created a set of  
112 standards in practice (EPA, 1992; FAO, 1985). In 1973, the World Health Organization (WHO)  
113 published health guidelines of wastewater recycling for farmland irrigation and aquaculture. The  
114 guidelines claimed that sewage for farmland should be treated strictly. As a result, guidelines referring  
115 to some indexes were adjusted, and new guidelines were published in 1989. However, those standards  
116 were too rigid and of little practical value when they were made popular. The result was that most  
117 countries and regions did not follow them. The Food and Agriculture Organization (FAO) also issued  
118 two technical reports about wastewater treatment and irrigation recycling, and control of effluent quality

119 controlling based on the current situation of sewage irrigation utilization worldwide (Pescod, 1992;  
120 Wescott, 1997). The water quality requirements and sewage treatment methods for agricultural  
121 irrigation were also discussed, and some guidance of sewage irrigation were proposed in view of the  
122 actual situation of the countries development levels,

123 .

## 124 **2. Application of sewage irrigation in China**

125 Compared with some developed countries, the source of sewage irrigation comes mainly from  
126 untreated or raw domestic and industrial wastewaters (Pedrero et al., 2010). There has been a long  
127 history on peasants in using human wastes to fertilize farmlands on many parts of China. The  
128 development of sewage irrigation emerged later given a level of economic development and  
129 urbanization for the country (Liu et al., 2005; Zeng et al., 2007; Zhang, 2014). There are three periods to  
130 take into account in accordance with the development scale and stage. The first period is classified as  
131 spontaneous irrigation because of using sewage effluents (Liu and Xu, 2002). Peasants who lived in the  
132 suburbs of Beijing began to mix domestic and industrial effluents for farmland irrigation in the 1940's.  
133 But considering that the emission loads of sewage were relatively limited to a small scale, the national  
134 sewage irrigation area was just only  $1.16 \times 10^2 \text{ km}^2$  (Li and Luo, 1995; Zhang, 2014). The second period  
135 is regarded as a preliminary stage of development from 1957 to 1972. In 1957, the Chinese government  
136 developed sewage irrigation projects. At this time, the Ministry of Construction Engineering,  
137 Agriculture and Health expanded sewage irrigation to national scientific research projects, prompting its  
138 preliminary development and forming a certain scale. The first pilot scheme for sanitary management of  
139 sewage irrigation was promulgated four years later (Zhang, 2014). Stepping into the 1970's, the  
140 implementation of reformation and opening policies, and household contract responsibility systems  
141 accelerated the development of urban and rural enterprises. Sewage irrigation entered a fast-developing  
142 period, and faced unprecedented historical challenges. Firstly, some problems of water resources  
143 shortage were gradually highlighted, and sewage irrigation areas increased dramatically as a result.  
144 More than  $3.62 \times 10^4 \text{ km}^2$  of farmlands in China were irrigated using sewage effluents at the end of the  
145 20th century (Wang and Lin, 2003). Although the Chinese government brought out and revised a series  
146 of irrigation water quality standards, which were applied to surface water, groundwater, aquaculture-

147 treated wastewater, and farmland irrigation, water came from effluents that were mainly agricultural  
148 products as raw material in 1979, 1985 and 1992. Some standards for controlling organic pollutants  
149 were also increased, and they became national mandatory standards (Shi et al., 2008). However, just  
150 like many laws and regulations in China, these standards only existed in name in practice (Fang, 2011;  
151 Jin and Young, 2001b). With the rapid development of the national economy, the industrial and  
152 domestic sewage water quality changed dramatically, and toxic and harmful organic pollutants  
153 increased continuously (Weber et al., 2006). Some current indicators of water quality standards could  
154 not adapt to the requirements for sewage irrigation. As a result the Chinese government came to realize  
155 about the hazards of sewage irrigation for agricultural production (Liu et al., 2005; Shi et al., 2006). A  
156 file of work arrangement on soil environmental protection and comprehensive adjustment for the near  
157 time was finally issued by the General Office of the State Council on January 28, 2013. This was the  
158 first time an authority explicitly prohibited the use of wastewater containing heavy metals, refractory  
159 organic pollutants and sludge, dredging of sediments, tailings that were untested, or safety disposal for  
160 agricultural production. However, the relevant standards or guidelines of wastewater irrigation including  
161 the new conditions have been delayed due to various economic benefits.

### 162 163 **3. Influence of sewage irrigation on soil properties**

164 Soil is not only the base for supporting plant both growth and breeding, but also the foundation of  
165 human agricultural production (Killham, 1994; Molles, 2008). All kinds of human agricultural  
166 production activities are mainly carried out in the soil, and abundant agricultural products are acquired  
167 directly or indirectly from it. Soil is located in the interface of the atmosphere, lithosphere, hydrosphere,  
168 and biosphere, participating in a variety of processes involving physics, chemistry and biochemistry,  
169 and becoming the crucial place of nutrient cycling and energy flux (Huang, 2000; Killham, 1994). Its  
170 existence provides a relatively stable survival and procreation environment for aboveground vegetation  
171 and underground microorganisms (Li et al., 2000).

172 In China, untreated sewage is often used directly for farmland irrigation in agricultural production.  
173 For substances dissolved in sewage, there are mainly four approaches of transference after migrating  
174 into the soil (Wang and Lin, 2003; Zeng and Zhu, 2004). Some of them would gradually be reduced by

175 the soil self-purification; others would be adsorbed and retained in the soil layer; some of them could be  
176 absorbed by the crops, and the rest would enter aquifers following water infiltration (Keesstra et al.,  
177 2012; Qadir et al., 2010). Soil, to some extent, has the capacity to clear and degrade pollutants via  
178 metabolism and transformation, increasing some nutrient content and fertility in the soil. However,  
179 long-term irrigation using sewage that does not conform with water quality standards allows infiltration  
180 of organic pollutants, heavy metals, solid suspended particles and bacteria microbes into the soil (Fatta-  
181 Kassinos et al., 2011; Meng et al., 2016; Rusan et al., 2007; Zeng et al., 2007). These contents,  
182 nevertheless, might be beyond the soil capacity of self-purification, causing serious soil pollution and  
183 giving rise to some changes of soil physical, chemical and biological characteristics.

184

### 185 **3.1 Effects on soil physical characteristics**

186

187 Long-term sewage irrigation damages the balance of nature, causing ecological deterioration on  
188 farmlands (Wiel-Shafran et al., 2006). Its most direct effect on soil physical properties includes  
189 structural damage, functional disturbance and soil hardening (Wang and Lin, 2003). Soil bulk density is  
190 one of the important indicators for measuring the effects on soil physical properties. It reflects the  
191 degree of soil compaction to a certain extent, which has a great influence on soil aeration, soil water  
192 holding and absorption capacities, infiltration, soil erosion resistance ability and solute migration  
193 (Huang, 2000). The porosity of soil depends on changes in soil bulk density (Neves et al., 2003). A study  
194 on the consecutive irrigation of calcareous soil in China showed that long-term sewage irrigation  
195 changed soil structure significantly. Soil porosity and bulk density had a close correlation with sewage  
196 irrigation time. As time increased from sewage irrigation, the soil porosity decreased while the soil bulk  
197 density increased (Li, 2001). Furthermore, irrigation by effluents containing high salinity increased soil  
198 salinization and enhanced both total and sodium alkalinity in the soil. This caused soil hardening and a  
199 decrease in soil permeability (Li et al., 2003; Li et al., 2006). There are also reports that the organic  
200 matter, microorganisms, fiber and sediments from sewage deposited in the soil surface exerted a  
201 negative impact on soil physical traits, which resulted in a degradation of soil permeability and an  
202 increased soil compaction (Siebe and Fischer, 1996).

203 The most conspicuous result of soil hardening is its resistance to penetration, which is an important

204 index for measuring the resistance to crop root elongation (Barber, 1994; Mullins et al., 1994).  
205 Generally, it is related to soil aggregate characteristics and soil particular spatial arrangement (Ahmed et  
206 al., 1987; Franzluebbbers et al., 2000). A study in the Weihe River irrigation area by Hu (2010) found that  
207 the topsoil of a farmland irrigated by sewage within the first 10 cm was directly loose, and its resistance  
208 to penetration was less than 500 kPa. As a result, it did not affect the crop root growth. However, its  
209 resistance to penetration became obvious deeper in the soil layer. This is because it was 415 kPa at  
210 10cm soil depth and 1473 kPa at 45cm soil depth. Study of compactness determines that there exists a  
211 trend for an unconsolidated topsoil layer, which was suitable for crop root growth, and increased the  
212 sensitivity of the crop to environmental change. Problems like soil compactness cannot be neglected in  
213 future agricultural production (Hernández et al., 2015).

214 Field capacity refers to the maximum amount of water maintained by the soil without including  
215 groundwater, and becomes the upper limit of available moisture for vegetation (Daniel, 1980; Qin,  
216 2003). It is controlled by soil structure and soil texture, playing a vital role in controlling farmland water  
217 balance, irrigation and drainage, drought and moisture conservation (Shao et al., 2006). The field  
218 capacity of loam would be greater than that of sand under normal conditions (Jia and Fan, 2007). When  
219 irrigated by sewage, its organic matter would go into the soil and increase the soil particle viscosity,  
220 thus increasing field capacity (Lan et al., 2010). Some similar research has confirmed that irrigation  
221 with eutrophic or untreated aquaculture wastewater did increase soil particle viscosity and enhanced  
222 field capacity (He, 2012; Wang and Lin, 2003).

223

### 224 **3.2 Impacts on soil chemical characteristics**

225 Sewage irrigation can affect soil chemical properties through its effects on the soil pH. This is one  
226 of important factors which affect soil fertility (Bao, 2000). The formation and change of the soil acidity-  
227 alkalinity depends on the relative strength of the process of base substances leaching and accumulation  
228 (Dheri et al., 2007). The degree of acidity or alkalinity can be more conveniently expressed by the pH  
229 value (Huang, 2000). Since the soil has a certain buffer capacity, the pH value is relatively stable (Masto  
230 et al., 2009). Once the pH value varies drastically, the soil chemical properties will be changed  
231 accordingly, which affects directly the existing form, transformation and availability of soil nutrients



232 (Ma and Zhao, 2010). Soil pH changes are related to the types of irrigation water and soil category  
233 (Wan et al., 2015). He et al. (2012) showed that the soil pH value would decrease with the increase of  
234 irrigation times using wastewater from hoggery to irrigate a yellow clay. On the other hand, Xia et al.  
235 (2011) showed that the value of pH in soil increased if irrigated by effluents from paper-making  
236 factories making a moderately degraded saline-alkali soil. It was also found that there was no obvious  
237 effect on the soil pH of a vegetable field when sewage came from a livestock breeding enterprise  
238 (Zhang et al., 2011). The reason for the fluctuation of the pH value could be explained by the different  
239 degrees of ammonification and nitrification of the soil organic matter, anaerobic organic matter  
240 decomposition, and release and enrichment of metal ions (Dheri et al., 2007; Rusan et al., 2007).

241 Organic matter is a significant component of the soil, and its content was usually be regarded as an  
242 important index for measuring soil fertility (Rattan et al., 2005). The accumulation of soil organic  
243 matter is not only closely related to natural environmental conditions, but it also depends on the input of  
244 organic matter by all means (Qin, 2003; Shao et al., 2006). Sewage irrigation could solve water shortage  
245 in the current agricultural production and also increases soil fertility. However, the amplitude of this  
246 increase showed great agrotpe and spatial differences (Xue, 2012). Irrigation by eutrophic sewage  
247 showed that the soil organic matter content of sandy and loamy soils increased significantly. Values for  
248 the loamy increased from 2.73 g/kg to 5.38 g/kg, (97.1%), while values for the sandy soil increased  
249 from 0.85 g/kg to 1.16 g/kg (36.5%) (Lan et al., 2010). Comparable differences in the content of soil  
250 organic matter also existed when considering increments of soil depth within the soil profile. Extremely  
251 significant increases in the content of soil organic matter were easily discovered within the first 20 cm  
252 of the topsoil, while the increase levels were significantly reduced with increases in soil depth (Hu,  
253 2010). Furthermore, much effort in maintaining the global carbon balance have focused on the soil  
254 organic matter, which is considered of having a unique role in affecting the global warming worldwide.  
255 The cumulative effects of soil organic matter from sewage irrigation have become one of the inputs of  
256 soil organic carbon in farmland and participated in the global carbon circulation (Rattan et al., 2005;  
257 Zhang et al., 2008b).

258 Nitrogen is an essential nutrient for crop growth, and its abundance and supply in the soil affect crop  
259 growth and development (Masto et al., 2009). A study of irrigation using aquaculture wastewater for a

260 long time showed that nitrogen accumulation in soil increased significantly, and the nitrogen content in  
261 soil was significantly greater than that of the untreated farmland for more than 12 years (Zhang et al.,  
262 2011). There existed an obvious eutrophication when farmland was irrigated by sewage over a long  
263 period of time: alkali-hydrolysable nitrogen content increased significantly in each study soil layer,  
264 especially in the soil surface and its content could reach  $8.26 \text{ mg kg}^{-1}$ , much higher than the average (Hu,  
265 2010). In the meantime, nitrogen accumulation in the soil profile was significantly affected by nitrogen  
266 mobility and irrigation infiltration (Wiel-Shafran et al., 2006). The accumulation of  $\text{NO}_2^-$  and  $\text{NO}_3^-$   
267 because of water eluviation caused groundwater pollution at shallow layers when polluted kratos water  
268 was adopted for irrigation (Zhang et al., 1996). Sewage irrigation had a lower impact on  $\text{NH}_4^+$  existing  
269 in deep soil and groundwater. However long-term sewage irrigated soil greatly influenced the  $\text{NO}_3^-$   
270 concentration, causing groundwater pollution from deep soil layer (Liu and Lu, 2002).

271 Phosphorus is one of the three essential nutrients for plants. Not only it constitutes the components  
272 of many important compounds in plants, but also participates in various metabolic processes in plants  
273 by all means (Dalai, 1977; Marschner et al., 2007; Redding et al., 2002). The studies on farmland and  
274 forest lands found that the total phosphorus had significantly increased in the surface soil and most of it  
275 could be kept in the upper soil (0-40 cm) using long-term wastewater irrigation (Hu et al., 2010; Hu et  
276 al., 2012). Comparable concentrations were found in farmlands irrigated with swine wastewater:  
277 phosphorus accumulated in the plowing layer (0-40cm) and increased with the advance of the time of  
278 irrigation (Yu, 2009). Reddling et al (2005) discovered that the soil available and total phosphorus  
279 contents were significantly higher than those from irrigation by piggery wastewater after anaerobic  
280 digestion, and phosphorus levels appeared to be a result of excessive accumulation in the top soil layer  
281 within 5 cm.

282 Potassium is also a major nutrient in higher plants; together with nitrogen and phosphorus they are  
283 known as the three essential factors for plant nutrition. Available potassium refers to the potassium that  
284 is easily absorbed by the plant and becomes the main diagnostic index of soil fertility (Huang, 2000;  
285 Qin, 2003). In studies of Hu (2010) and Masto et al. (2009), the soil available potassium content  
286 increased greatly after sewage irrigation. This was mainly because a lot of nutrients were contained in  
287 the sewage, making available potassium enrichment possible in the soil surface. The content of total

288 potassium in soil could also be improved for the application of molasses alcohol water in the sewage  
289 irrigation; it significantly increased total soil potassium content, improving soil fertility (Xu, 2007).

290 In general, heavy metals from sewage effluents could be adsorbed by soil particles. Because of this  
291 most heavy metal ions are concentrated in the soil, resulting in soil heavy metal pollution. It has become  
292 the most serious problem for human health (Liu et al., 2005; Mapanda and Mangwayana, 2005; Wan et  
293 al., 2015). According to the bulletin of soil pollution published by the Chinese government in 2014, 39  
294 out of 55 surveyed areas irrigated by sewage showed soil contamination by heavy metals. As much as  
295 26.4% exceeded the maximum permitted levels of total of 1378 soil points, and the main pollutants  
296 were cadmium, arsenic and polycyclic aromatic hydrocarbons. This metal distribution was  
297 homogeneous, but heavy metal spatial distribution has shown important differences (Hu et al., 2006;  
298 Khan et al., 2008; Liu et al., 2005). A broad distinction of vertical distribution of heavy metal pollution  
299 was drawn in the soil profile. Cao (2014) concluded that heavy metal elements mainly concentrated in  
300 the soil within the first 50cm from the soil surface, and its vertical distribution varied with soil texture.  
301 Heavy metal content was related to the lithology structure in the soil vadose zone. Silt was not favorable  
302 for heavy metal accumulation and sandy soil took the second place. The main enrichment of heavy  
303 metals was reported in loamy soil (Wang and Lin, 2003). The degree of heavy metal enrichment in soil  
304 is also closely related to the timing of wastewater irrigation and the concentration of heavy metal ions in  
305 sewage (Liu et al., 2005; Rattan et al., 2005). Wang et al (2008) found that long-term, excessive  
306 irrigation by sewage exceeded the standards and posed a threat to soils. This is, Cu, Pb, Zn, Cd, As, Hg,  
307 Cr and other harmful substances seriously exceeded the limits of soil capacity. Five toxic metals (Cd, Cr,  
308 Cu, Zn, Pb) increased during sewage irrigation of farming areas in Beijing and Shenyang, and pollution  
309 with Cd, Cu, Zn, and Pb was exacerbated in soils (Sun et al., 2006; Wang et al., 2006). Ultimately, these  
310 heavy metals are dangerous to human health through various food chains (Loska et al., 2004).

311 In addition to heavy metal pollution in soil, there exist various other degrees of organic pollutants in  
312 some sewage irrigation areas (Qadir et al., 2010). Organic pollutants, such as aromatic hydrocarbons,  
313 phenols, and organic chlorines are easily discovered in industrial wastewaters (Tian et al., 1993). A  
314 research by collecting seven different soil samples depths irrigated by wastewater in Taiyuan, Shanxi  
315 Province, determined that the constituent parts in sewage diversified and were extremely complicated;

316 they were pollutants as plasticizer, such as phthalate esters, skatole, sterols, polycyclic aromatic  
317 hydrocarbons and so on. The most serious pollution of polycyclic aromatic hydrocarbons was found in  
318 soil. This substance has penetrated into the groundwater and also been detected in the nearby shallow  
319 groundwater (Du et al., 2010). A survey in the Shenyang and Fushun sewage irrigation area, the China's  
320 largest oil wastewater irrigated area, showed that the accumulation of toxic substances because of the  
321 petrochemical industrial sewage was serious. Among the toxic substances, the aromatic hydrocarbons  
322 represented an important proportion, and the carcinogens benzene and pyrene were severely exceeded  
323 (Zhang et al., 2003). The sensory indicators of rice produced in this region were extremely poor, with  
324 strong smell from oils and aromatic compounds (Fang, 2011).

325

### 326 **3.3 Influence of soil microorganisms and enzyme activities**

327 Soil microorganisms, as an important part for maintaining soil quality, participates in most of soil  
328 biological and biochemical activities, and are sensitive to reflect changes of soil quality health (Stenberg,  
329 1999). The quantity, composition and activity of soil microbial population are a dynamic process;  
330 environmental changes and the number of microbial living cells constitute one of the most sensitive  
331 biological indicators (Li et al., 2005a). Sewage irrigation would cause a change of microhabitat to some  
332 extent, having a great effect on soil microbial activities (Zhang et al., 2008b). Soil bacteria, fungi and  
333 actinomycetes can be used to reflect the total amount of soil microorganisms that play a significant role  
334 on soil organic matter and inorganic material transformation (Aleem et al., 2003). The number of  
335 bacteria and actinomycetes in the soil showed a descending trend after long-term sewage irrigation,  
336 while the number of fungi increased slowly (Ge et al., 2009). Similar results were found in the  
337 Shenyang and Fushun sewage irrigation region: sewage irrigation changed the content of soil nutrients  
338 and multiring hydrocarbon, and then had a direct effect on microbial populations. Their total nitrogen  
339 showed very significantly positive correlations with bacteria, nitrogen-fixing bacteria, and phosphorus  
340 bacteria (Zhang et al., 2007; Zhang et al., 2008a). In the meantime, the way of sewage irrigation  
341 application also affected the number of soil microorganisms (Heidarpour et al., 2007). A series of  
342 studies by Oron et al (1999) displayed that soil surface humidity affected the total number of soil  
343 bacteria after sewage irrigation. When subsurface or underground drip irrigation was adopted, the total

344 number of bacteria of subsurface drip irrigation was much higher than that of the underground. The  
345 most likely explanation would appear to be that soil played a role of secondary filter in the process of  
346 sewage infiltration, reducing the contact probability between sewage and aboveground vegetation parts  
347 (Oron et al., 1999; Oron et al., 1995).

348 Soil enzymes are active substances found in the soil, primarily coming from the soil microbes and  
349 plant root secretions and enzymes released by the decomposition of animal and plant residues (Burns  
350 and Dick, 2002; Cao et al., 2003). Common enzymes mainly include oxidoreductases, hydrolytic  
351 enzymes, crack enzymes and transference enzymes, all of which participate in and promote a large  
352 proportion of organic substance transformation and material circulation by various of soil ecological  
353 processes (Zhang et al., 2011). Some relevant research has produced evidence to suggest that irrigation  
354 by petroleum-processed wastewater could stimulate aerobic heterotrophic bacteria and fungi growth in  
355 the soil. The total petroleum hydrocarbon content in the soil showed a positive correlation with the soil  
356 dehydrogenase, catalase and polyphenol oxidase activities and a negative correlation with the soil  
357 urease activity (Li et al., 2005b). Other observations were found that soil enzyme activities were  
358 influenced by soil nutrients and multiring hydrocarbon pollution, after long-term irrigation by  
359 petroleum-processing wastewater. The soil both organic carbon and total phosphorus content showed  
360 significant relationships with the dehydrogenase, polyphenol oxidase and urease activities. The content  
361 of multiring hydrocarbon was significantly positive correlated with the dehydrogenase, urease, and  
362 polyphenol oxidase activities (Zhang et al., 2007; Zhang et al., 2008a). In Baoding, Hebei Province, a  
363 heavy industry city, it was determined that the soil urease and hydrogen peroxide enzyme activities  
364 increased with increases of soil Pb and Cd contents (Liu, 1996). Many studies have shown indirect  
365 influences caused by sewage irrigation such as soil secondary salinization in calcareous drab soil, which  
366 lead to constrain enzyme activities, causing a decline in soil environmental quality (Li, 2001).

367

#### 368 **4. Implications for sewage irrigation development in the future**

369 For the current development of sewage irrigation in China, governors must clearly realize that  
370 wastewater discharge itself is a guarantee to replace the water scarcity for grain production, and the  
371 huge population demands for food in China. On the other hand, the adverse effects brought by the

372 sewage irrigation were removed completely. Therefore, any research and development involving  
373 sewage irrigation have to consider carefully the current situation in China. We suggest that four aspects  
374 should be taken into account for achieving a safe and efficient utilization of farmland wastewater  
375 irrigation in China.

376

#### 377 **4.1 Strict control of the pollution and supervising systems**

378 At present, the first question for sewage irrigation in China is to solve the quality problem gradually.  
379 Starting from the sewage source, water quality monitoring should be much greater, and water quality of  
380 the wastewater entering the farmland should be strictly controlled (Engineering, 2000; Qadir et al., 2010;  
381 Yang, 2000). Contaminated water that seriously exceeds the threshold levels should be forbidden from  
382 discharging and utilization. Currently, governors always adopt an attitude towards removing  
383 responsibility of supervision and administration of sewage in the practice. Therefore, a management  
384 system of sewage irrigation should be established and implemented urgently. It has to explicit the  
385 appropriate responsibilities and embodiment at different stages of sewage discharge, disposal and  
386 irrigation (Shi et al., 2014; Zeng and Zhu, 2004). For the companies and individuals in the wastewater  
387 irrigation area, awareness of environmental protection should be increased. For that illegal discharge,  
388 sewage behavior enterprises punishment needs to be much greater than their illegal profit. For the  
389 individual, the health risks from sewage irrigation should be extensively published, enhancing  
390 awareness of environmental and human health (Rattan et al., 2005; Wan et al., 2015).

391

#### 392 **4.2 Optimize the way of sewage irrigation, and avoid irrigation using a single-type-sewage for a** 393 **long time**

394 China has summarized some effective methods for sewage irrigation techniques through several  
395 decades of practicing. They include oxidation pond purifying wastewater treatment, and mixed  
396 irrigation between wastewater and clear water (Hong et al., 2011). However, the flooding irrigation  
397 mode is the most common adopted in the vast area of sewage irrigation. On the one hand, it wastes a lot  
398 of valuable sewage resources. At the same time, however, it causes serious soil pollution (Zhang et al.,  
399 2005). Thus, the current model of sewage irrigation should be changed and optimized, combining

400 agricultural water-saving irrigation with sewage pretreatment, and developing an underground, aerated  
401 drip sewage irrigation. Considering the different crop growth stages, edible parts and contaminants in  
402 wastewater irrigation, sewage irrigation time and quantity need to be allocated reasonably, reducing the  
403 effect of sewage irrigation on crop growth and human health (Oron et al., 1999; Oron et al., 1995).

404

#### 405 **4.3 Control of sewage irrigation to local conditions and protecting groundwater resources**

406 Because of improper irrigation facilities and methods, unscientific irrigation systems and low  
407 management levels, field irrigation efficiency is low and percolation towards deep soil layers is serious  
408 (Liu and Xu, 2002). Failing in making a proper sewage irrigation or irrigation by untreated sewage  
409 easily gives rise to infiltration of pollutants in the soil, endangering the security of drinking water and  
410 even forming inverse funnels of sewage, which pose a threat to deep groundwater. Once groundwater is  
411 contaminated, it will be difficult to recover, and the consequences will be severe. It seems reasonable to  
412 assume that it will not be suitable for sewage irrigation for some unadaptable wastewater irrigation  
413 areas such as those with strong soil permeability, high underground water level, aquifer outcrops and  
414 centralized drinking water sources, which will easily lead to groundwater pollution and be unfavorable  
415 to human health (Qadir et al., 2010; Zhou, 2002). Therefore, it is appropriate to adjust measures to local  
416 conditions for sewage irrigation, and reduce the environmental risks caused by sewage irrigation.

417

#### 418 **4.4 Adsorption and degradation of soil harmful substances by some plant and microbe** 419 **characteristics of selective absorption**

420 In the technical field of heavy metal contaminated soil repair, phytoremediation is highly favored for  
421 its advantages such as an excellent reinforced effect, low cost and high environmental benefits (Nie et  
422 al., 2016). At the same time, microorganisms could either fix heavy metal ions through their metabolic  
423 functions or convert toxic heavy metal ions into non-toxic or low-toxic conditions (Li et al., 2015).  
424 Hyperaccumulators could be introduced to repair soils contaminated by sewage irrigation adopting their  
425 own strong absorption ability for some heavy metals and non-heavy metal toxicity. Furthermore, the  
426 function of microbial selective absorption was jointly utilized to establish the system of plant-microbial  
427 repairment, improving the efficiency of heavy metal pollution soil restoration (Rajkumar et al., 2010).

428

## 429 **5. Conclusion**

430 The biggest challenge that the Chinese government is now facing is how to meet the soaring water  
431 demand of its expanding urban and industrial portions without decreasing its own agricultural needs. In  
432 consideration of world food security, sewage irrigation on a mass scale is indeed as an alternative way  
433 for water shortage in some areas of China. However, the effects of inappropriate sewage irrigation on  
434 soil physical (soil bulk density, soil resistance to penetration and field capacity), chemical (pH, soil  
435 organic matter, nitrogen, phosphorus, potassium, heavy metal and organic pollutants) and biological  
436 characteristics (soil microorganisms and enzyme activities) in farmlands should paid attention to its  
437 practical application. Some relevant, proper irrigation facilities and methods, scientific irrigation  
438 systems from agriculture and water resource departments, and high sewage management levels are  
439 worth applying. This is together with clear rewards and punishments from the government, popularized  
440 and applied in line with local conditions, promoting reclamation and high treatment efficiency of  
441 effluents in China.

442

## 443 **Acknowledgements**

444 This study was supported by the National Natural Science Foundation of China (51379085) and the  
445 School of Resource and Environment, Henan Institute of Science and Technology, China.

446

## 447 **References**

- 448 Abaidoo, R. C., Keraita, B., Drechsel, P., Dissanayake, P., and Maxwell, A. S.: Soil and crop contamination through wastewater  
449 irrigation and options for risk reduction in developing countries, Springer, London, 2010.
- 450 Abu-Sharar, T. M., Hussein, I. A., and Al-Jayyousi, O. R.: The use of treated sewage for irrigation in Jordan: oportunities and  
451 constraints *Water & Environment Journal*, 17, 232-238, 2010.
- 452 Ahmed, H. A.-M., Gerald, E. S., and Hart, R. H.: Soil Bulk Density and Water Infiltration as Affected by Grazing Systems,  
453 *Journal of Range Management*, 40, 307-309, 1987.
- 454 Aleem, A., Isar, J., and Malik, A.: Impact of long-term application of industrial wastewater on the emergence of resistance  
455 traits in *Azotobacter chroococcum* isolated from rhizospheric soil, *Bioresource Technology*, 86, 7-13, 2003.
- 456 Angelakis, A. N., Monte, M. H. F. M. D., Bontoux, L., and Asano, T.: The status of wastewater reuse practice in the  
457 Mediterranean basin: need for guidelines, *Water Research*, 33, 2201-2217, 1999.
- 458 Bao, S. D.: *Soil and Agricultural chemistry analysis*, China Agriculture Press, Beijing, 2000.
- 459 Barber, R. G.: Persistence of Loosened Horizons and Soybean Yield Increases in Bolivia, *Soil Science Society of America*  
460 *Journal*, 58, 943-950, 1994.



461 Bouri, S., Abida, H., and Khanfir, H.: Impacts of wastewater irrigation in arid and semi arid regions: case of Sidi Abid region,  
462 Tunisia, *Environmental Geology*, 53, 1421-1432, 2008.

463 Bouwer, H.: Irrigation and global water outlook, *Agricultural Water Management*, 25, 221-231, 1994.

464 Brown, L. R.: Who will feed China? Wake-up call for a small planet, 1995.

465 Brown, L. R. and Halweil, B.: China's water shortage could shake world food security, *World Watch*, 11, 11-21, 1998.

466 Burns, R. G. and Dick, R. P.: *Enzymes in the Environment*, Marcel Dekker, New York& Basel, 2002.

467 Cao, H., Sun, H., and Yang, H.: A review: Soil enzyme activity and its indication for soil quality, *Chinese Journal of Applied &*  
468 *Environmental Biology*, 9, 105-109, 2003.

469 Cao, S. P.: Vertical distribution of heavy metal pollutant in soil profile of Tianjin, *Contributions to Geology & Mineral*  
470 *Resources Research*, 19, 270-274, 2004.

471 Chen, P. H., Leung, K. C., and Wang, J. T.: Investigation of a ponding irrigation system to recycle agricultural wastewater,  
472 *Environment International*, 26, 63-68, 2000.

473 Chen, Z. J. and Zhou, J. B.: Application of Treated Wastewater on Agriculture in Israel, *Agro-environmental Protection*, 20,  
474 462-464, 2001.

475 Dalai, R. C.: Soil Organic Phosphorus, *Advances in Agronomy*, 29, 83-117, 1977.

476 Daniel, H.: *Application of Soil Physics*, Academic Press, Inck, 1980.

477 Dheri, G. S., Brar, M. S., and Malhi, S. S.: Heavy - Metal Concentration of Sewage - Contaminated Water and Its Impact on  
478 Underground Water, Soil, and Crop Plants in Alluvial Soils of Northwestern India, *Communications in Soil Science & Plant*  
479 *Analysis*, 38, 1353-1370, 2007.

480 Du, B., Gong, J., and Li, J. I.: Study on organic pollution of soil and water environment by sewage irrigation in Taiyuan City,  
481 Yangtze River, 41, 58-61, 2010.

482 Engineering, C. A. O.: Strategic Research on Sustainable Development of Water Resource in China, *Engineering*, 2, 1-17,  
483 2000.

484 EPA: *Guidelines for Water Reuse*, EPA, Washington DC, 1992.

485 Fang, Y. D.: Research on the current situation, prevention and treatment of farmland wastewater irrigation in China, *Journal*  
486 *of Agricultural Resources and Environment*, 5, 1-6, 2011.

487 FAO: *Water quality for irrigation*, Irrigation and Drainage Paper, Rome, 1985.

488 Fatta-Kassinos, D., Kalavrouziotis, I. K., Koukoulakis, P. H., and Vasquez, M. I.: The risks associated with wastewater reuse  
489 and xenobiotics in the agroecological environment, *Science of the Total Environment*, 409, 3555-3563, 2011.

490 Francks, P.: The development of new techniques in agriculture: The case of the mechanization of irrigation in the Saga Plain  
491 area of Japan, *World Development*, 7, 531-539, 1979.

492 Franzluebbers, A. J., Wright, S. F., and Stuedemann, J. A.: Soil aggregation and glomalin under pastures in the Southern  
493 Piedmont USA, *Soil Science Society of America Journal*, 64, 1018-1026, 2000.

494 Ge, H. L., Chen, L., Zhang, J. L., and Huang, W. S.: Effect of Long-term Sewage Irrigation on Rhizosphere Soil Microbial  
495 Populations of Wheat, *Water Saving Irrigation*, 5, 14-15, 2009.

496 Gu, S., Jenkins, A., Gao, S. J., Lu, Y., Li, H., Li, Y., Ferrier, R. C., Bailey, M., Wang, Y., and Zhang, Y.: Ensuring water resource  
497 security in China; the need for advances in evidence-based policy to support sustainable management, *Environmental*  
498 *Science & Policy*, 75, 65-69, 2017.

499 Hass, U., Dünnbier, U., and Massmann, G.: Occurrence of psychoactive compounds and their metabolites in groundwater  
500 downgradient of a decommissioned sewage farm in Berlin (Germany), *Environment Science Pollution Research Interional*,  
501 19, 2096-2106, 2012.

502 He, Y.: *The impact of pig farming waste water irrigation on soil physical and chemical properties* Master, Chengdu University  
503 of Technology, Chengdu, 2012.

504 Heidarpour, M., Mostafazadeh-Fard, B., Koupai, J. A., and Malekian, R.: The effects of treated wastewater on soil chemical  
505 properties using subsurface and surface irrigation methods, *Agricultural Water Management*, 90, 87-94, 2007.

506 Hernández, J. P., Befani, M. R., Boschetti, N. G., Quintero, C. E., E, E. L. D., Lado, M., and Pazgonzález, A.: Impact of Soil  
507 Resistance to Penetration in the Irrigation Interval of Supplementary Irrigation Systems at the Humid Pampa, Argentina,

508 Journal of Cardiac Failure, 12, S87–S88, 2015.

509 Heukelekian, H.: Utilization of Sewage for Crop Irrigation in Israel, *Sewage & Industrial Wastes*, 29, 868-874, 1957.

510 Hong, H. J., Rui, M. W., Lin, T. S., Quan, P. F., Feng, N., and Zhou, X. J.: Oxidation Pond/Constructed Wetland for Treatment of  
511 Urban Polluted River Water, *China Water & Wastewater*, 27, 35-38, 2011.

512 Hu, H. R., Ma, H. C., and Wang, Y. X.: Influence of Land Use Types to Nutrients, Organic Carbon and Organic Nitrogen of Soil,  
513 *Soil & Water Conservation in China*, 11, 40-43, 2010.

514 Hu, H. R., Wang, H. L., Katie, B., and Mark, K.: Effect of long term effluent irrigation on content and movement of  
515 phosphorus in soil of forest land, *Acta Pedologica Sinica*, 49, 560-566, 2012.

516 Hu, H. Y.: Effect of sewage irrigation water on soil quality in farmland, 2010. Northwest A&F University, Yangling, 2010.

517 Hu, K. L., Zhang, F. R., Hong, L., Huang, F., and Li, B. G.: Spatial Patterns of Soil Heavy Metals in Urban-Rural Transition Zone  
518 of Beijing, *Pedosphere*, 16, 690-698, 2006.

519 Huang, C. Y.: *Soil Science*, China Agriculture Press, Beijing, 2000.

520 Jia, F. and Fan, G. S.: Study on the relationship between soil texture and field water holding rate, *Soil and Water  
521 Conservation Science and Technology in Shanxi*, 3, 17-19, 2007.

522 Jin, L. and Young, W.: Water Use in Agriculture in China: Importance, Challenges, and Implications for Policy, *Water Policy*, 3,  
523 215-228, 2001a.

524 Jin, L. S. and Young, W.: Water Use in Agriculture in China: Importance, Challenges, and Implications for Policy, *Water Policy*,  
525 3, 215-228, 2001b.

526 JR, K.: Biological Integrity: A Long-Neglected Aspect of Water Resource Management, *Ecological Application.*, 1, 66-84, 1991.

527 Jueschke, E., Marschner, B., Tarchitzky, J., and Chen, Y.: Effects of treated wastewater irrigation on the dissolved and soil  
528 organic carbon in Israeli soils, *Water Science & Technology A Journal of the International Association on Water Pollution  
529 Research*, 57, 727-733, 2008.

530 Keesstra, S. D., Geissen, V., Mosse, K., Piirainen, S., Scudiero, E., Leistra, M., and van Schaik, L.: Soil as a filter for  
531 groundwater quality, *Current Opinion in Environmental Sustainability*, 4, 507-516, 2012.

532 Khan, S., Cao, Q., Zheng, Y. M., Huang, Y. Z., and Zhu, Y. G.: Health risks of heavy metals in contaminated soils and food crops  
533 irrigated with wastewater in Beijing, China, *Environmental Pollution*, 152, 686-692, 2008.

534 Killham, K.: *Soil Ecology*, Cambridge University Press, Cambridge, 1994.

535 Lan, M. J., Li, M. S., Zhao, G. J., and Rui, L.: Effects of Eutrophic Sewage Irrigation on Soil-holding Capacity, *Journal of Shihezi  
536 University*, 28, 497-500, 2010.

537 Li, B., Yang, C., and Lin, P.: *Ecology*, Higher Education Press, Beijing, 2000.

538 Li, F., Benhur, M., and Keren, R.: Effect of marginal water irrigation on soil salinity, sodicity and crop yield, *Transactions of  
539 the Chinese Society of Agricultural Engineering*, 19, 63-66, 2003.

540 Li, F., Huang, G., Ding, Y., and Peng, C.: Effects of soil alkalinity, gypsum application, and filtration disposal on hydraulic  
541 conductivity under irrigation with domestic effluent water, *Transactions of the Chinese Society of Agricultural Engineering*,  
542 22, 48-52, 2006.

543 Li, H., Chen, G., Yang, T., and Zhang, C.: Impacts of petroleum-containing wastewater irrigation on microbial population and  
544 enzyme activities in paddy soil of Shenfu irrigation area, *Chinese Journal of Applied Ecology*, 16, 1355-1359, 2005a.

545 Li, H., Chen, G. X., Yang, T., and Zhang, C. G.: [Impacts of petroleum-containing wastewater irrigation on microbial  
546 population and enzyme activities in paddy soil of Shenfu irrigation area], *Chinese Journal of Applied Ecology*, 16, 1355-1359,  
547 2005b.

548 Li, L. Q.: Study on Properties of Physies and Chemistry of Cinnamon Soil with Wastewater Irrigation, *Journal of Shanxi  
549 Agricultural University*, 21, 73-75, 2001.

550 Li, S. Z. and Luo, J. F.: *Sewage irrigation and environmental quality control in China*, China Meteorological Press, Beijing, 1995.

551 Li, Y. S., Feng, C. L., Wu, X. F., and Shi, R.: A review on the functions of microorganisms in the phytoremediation of heavy  
552 metal-contaminated soils, *Acta Ecologica Sinica*, 35, 6881-6890, 2015.

553 Liu, L. and Lu, G. H.: Nitrogen wastewater irrigation study and its contamination risk analysis, *Advances in Water Science*, 13,  
554 313-320, 2002.

555 Liu, R. T. and Xu, J. Z.: Sewage water irrigation problems and solutions in China, *China Water Resources*, 10, 123-125, 2002.

556 Liu, S. Q.: Relationship between soil pb and cd pollution and enzyme activities in wastew ater irrigated area of baoding city,  
557 *Acta Pedologica Sinica*, 33, 175-182, 1996.

558 Liu, W. H., Zhao, J. Z., Ouyang, Z. Y., Söderlund, L., and Liu, G. H.: Impacts of sewage irrigation on heavy metal distribution  
559 and contamination in Beijing, China, *Environment International*, 31, 805-812, 2005.

560 Loska, K., Wiechuła, D., and Korus, I.: Metal contamination of farming soils affected by industry, *Environment International*,  
561 30, 159-165, 2004.

562 Lottermoser, B. G.: Effect of long-term irrigation with sewage effluent on the metal content of soils, Berlin, Germany,  
563 *Environmental Geochemistry & Health*, 34, 67-76, 2012.

564 Ma, Q. and Zhao, G. X.: Effects of Different Land Use Types on Soil Nutrients in Intensive Agricultural Region, *Journal of*  
565 *Natural Resources*, 25, 1834-1844, 2010.

566 Mapanda, F. and Mangwayana, E. N.: The Effects of Long-Term Irrigation Using Water on Heavy Metal Contents of Soils  
567 under Vegetables, *Agriculture Ecosystems & Environment*, 107, 151-165, 2005.

568 Marschner, P., Solaiman, Z., and Rengel, Z.: Brassica genotypes differ in growth, phosphorus uptake and rhizosphere  
569 properties under P-limiting conditions, *Soil Biology & Biochemistry*, 39, 87-98, 2007.

570 Masto, R. E., Chhonkar, P. K., Singh, D., and Patra, A. K.: Changes in soil quality indicators under long-term sewage irrigation  
571 in a sub-tropical environment, *Environmental Geology*, 56, 1237-1243, 2009.

572 Meng, W. Q., Wang, Z. W., Hu, B. B., Wang, Z. L., Li, H. Y., and Goodman, R. C.: Heavy metals in soil and plants after long-  
573 term sewage irrigation at Tianjin China: A case study assessment, *Agricultural Water Management*, 171, 153-161, 2016.

574 Molles, M.: *Ecology: Concepts and Application*, McGraw-Hill Education, London, 2008.

575 Morishita, T.: Environmental hazards of sewage and industrial effluents on irrigated farmlands in Japan, Elsevier Ltd, London,  
576 1988.

577 Mullins, G. L., Reeves, D. W., Burmester, C. H., and Bryant, H. H.: In-Row Subsoiling and Potassium Placement Effects on Root  
578 Growth and Potassium Content of Cotton, *Agronomy Journal*, 86, 136-139, 1994.

579 Neves, C. S. V. J., Feller, C., Guimarães, M. F., Medina, C. C., Filho, J. T., and Fortier, M.: Soil bulk density and porosity of  
580 homogeneous morphological units identified by the Cropping Profile Method in clayey Oxisols in Brazil, *Soil & Tillage*  
581 *Research*, 71, 109-119, 2003.

582 Nie, Y. P., Wang, X. W., Wan, J. R., Yin, Y. Y., Xu, W. P., and Yang, W. T.: Research progress on heavy metal (Pb, Zn, Cd, Cu)  
583 hyperaccumulating plants and strengthening measures of phytoremediation, *Ecological Science*, 35, 174-182, 2016.

584 Oron, G., Campos, C., Gillerman, L., and Salgot, M.: Wastewater treatment, renovation and reuse for agricultural irrigation  
585 in small communities, *Agricultural Water Management*, 38, 223-234, 1999.

586 Oron, M. G., Goemans, M., Manor, Y., and Feyen, J.: Poliovirus distribution in the soil-plant system under reuse of secondary  
587 wastewater, *Water Research*, 29, 1069-1078, 1995.

588 Pedrero, F., Kalavrouziotis, I., Alarcón, J. J., Koukoulakis, P., and Asano, T.: Use of treated municipal wastewater in irrigated  
589 agriculture - review of some practices in Spain and Greece, *Agricultural Water Management*, 97, 1233-1241, 2010.

590 Pescod, M. B.: *Wastewater treatment and use in agriculture* FAO, Rome, 1992.

591 Piao, S., Ciais, P., Huang, Y., Shen, Z., Peng, S., Li, J., Zhou, L., Liu, H., Ma, Y., and Ding, Y.: The impacts of climate change on  
592 water resources and agriculture in China, *Nature*, 467, 43, 2010.

593 Qadir, M., Sharma, B. R., Bruggeman, A., Choukr-Allah, R., and Karajeh, F.: Non-conventional water resources and  
594 opportunities for water augmentation to achieve food security in water scarce countries, *Agricultural Water Management*,  
595 87, 2-22, 2007.

596 Qadir, M., Wichelns, D., Raschidsally, L., Mccornick, P. G., Drechsel, P., Bahri, A., Minhas, P. S., Molden, D., and De Fraiture, C.:  
597 The challenges of wastewater irrigation in developing countries, *Agricultural Water Management*, 97, 561-568, 2010.

598 Qin, Y. D.: *Soil Physics*, Higher Education Press, Beijing, 2003.

599 Rajkumar, M., A. N., Prasad, M., and Freitas, H.: Potential of siderophore-producing bacteria for improving heavy metal  
600 phytoextraction, *Trends in Biotechnology*, 28, 142-149, 2010.

601 Rattan, R. K., Datta, S. P., Chhonkar, P. K., Suribabu, K., and Singh, A. K.: Long-term impact of irrigation with sewage effluents

602 on heavy metal content in soils, crops and groundwater--a case study, *Agriculture Ecosystems & Environment*, 109, 310-322,  
603 2005.

604 Redding, M. R., Biggs, A., Gardner, T., and Duperouzel, D.: An overview of land application of pig effluent-P using soil P  
605 chemistry and mass balance calculations, *Soil Research*, 40, 81-91, 2002.

606 Rusan, M. J. M., Hinnawi, S., and Rousan, L.: Long term effect of wastewater irrigation of forage crops on soil and plant  
607 quality parameters, *Desalination*, 215, 143-152, 2007.

608 Sabol, G. V., Bouwer, H., and Wierenga, P. J.: Irrigation Effects in Arizona and New Mexico, *Journal of Irrigation & Drainage*  
609 *Engineering*, 113, 30-48, 1987.

610 Shao, M. A., Wang, Q. J., and Huang, M. B.: *Soil physics*, Higher Education Press, Beijing, 2006.

611 Shi, R. G., Wang, D. R., Zhao, Y. J., Liu, F. Z., Gao, H. Y., Cai, Y. M., and Shen, Y.: Water Quality Control Indexes of Reclaimed  
612 Municipal Wastewater for Farmland Irrigation, *China Water & Wastewater*, 22, 100-104, 2006.

613 Shi, R. G., Zhou, Q. X., Liu, F. Z., Zhao, Y. J., Zheng, X. Q., Cai, Y. M., and Wang, D. R.: Water Quality Standard and Irrigation  
614 Regulation of Reclaimed Water from Municipal Wastewater for Farmland Irrigation, *Journal of Agro-Environment Science*,  
615 27, 839-843, 2008.

616 Shi, Y., X B, Q., and Gao, Q.: Advance in Sewage Irrigation Safety Research and Proposal Countermeasure in China, *Water*  
617 *Saving Irrigation*, 3, 37-44, 2014.

618 Siebe, C. and Fischer, W. R.: Effect of long-term irrigation with untreated sewage effluents on soil properties and heavy  
619 metal adsorption of leptosols and vertisols in Central Mexico, *Journal of Plant Nutrition & Soil Science*, 159, 357-364, 1996.

620 Singh, P. K., Deshbhratar, P. B., and Ramteke, D. S.: Effects of sewage wastewater irrigation on soil properties, crop yield and  
621 environment, *Agricultural Water Management*, 103, 100-104, 2012.

622 Stenberg, B.: Monitoring Soil Quality of Arable Land: Microbiological Indicators, *Acta Agriculturae Scandinavica*, 49, 1-24,  
623 1999.

624 Sun, L. N., Zhang, Y. H., Sun, T. H., Gong, Z. Q., Lin, X., and Li, H. B.: Temporal-spatial distribution and variability of cadmium  
625 contamination in soils in Shenyang Zhangshi irrigation area, China, *Journal of Environmental Sciences*, 18, 1241-1246, 2006.

626 Tang, C., Chen, J., Shindo, S., Sakura, Y., Zhang, W., and Shen, Y.: Assessment of groundwater contamination by nitrates  
627 associated with wastewater irrigation: A case study in Shijiazhuang region, China, *Hydrological Processes*, 18, 2303-2312,  
628 2004.

629 Thomas, A.: Agricultural irrigation demand under present and future climate scenarios in China, *Global & Planetary Change*,  
630 60, 306-326, 2008.

631 Tian, J. Y., Zhang, H. K., Bao, J. M., and Wang, F. H.: Organic Compound Pollution in Xiaoqing River and Its Influence on  
632 Ecosystem of Sewage-Irrigated Area, *Chinese Journal of Ecology*, 12, 14-22, 1993.

633 Vörösmarty, C. J., Green, P., Salisbury, J., and Lammers, R. B.: Global water resources: vulnerability from climate change and  
634 population growth, *Science*, 289, 284, 2000.

635 Wallach, R., Ben-Arie, O., and Graber, E. R.: Soil water repellency induced by long-term irrigation with treated sewage  
636 effluent, *Journal of Environmental Quality*, 34, 1910-1920, 2005.

637 Wan, L., Zhang, M. R., Lu, S., and Hu, K.: Study Progress on Effect of Polluted Water Irrigation on Soil and Problem Analysis,  
638 *Ecology and Environmental Sciences*, 24, 906-910, 2015.

639 Wang, G. L. and Lin, W. J.: Contamination of Soil from Sewage Irrigation and Its Remediation, *Journal of Agro-environmental*  
640 *Science*, 22, 163-166, 2003.

641 Wang, G. L., Liu, C. Z., Lu, Z. Y., and Wang, A. P.: Influences of sewage irrigation on the field soil quality in Baiyin City, *Journal*  
642 *of Gansu Agricultural University*, 41, 79-82, 2006.

643 Wang, Y., Sheng, L. X., Li, K., and Sun, H. Y.: Analysis of present situation of water resources and countermeasures for  
644 sustainable development in China, *Journal of Water Resources & Water Engineering*, 19, 10-14, 2008.

645 Wang, Y. Q., Li, S. Y., and Cai, X. D.: Advance of Research on Sewage Irrigation in Farmland in China, *Tianjin Agricultural*  
646 *Sciences*, 16, 77-80, 2010.

647 Weber, S., Khan, S., and Hollender, J.: Human risk assessment of organic contaminants in reclaimed wastewater used for  
648 irrigation, *Desalination*, 187, 53-64, 2006.

649 Wescott, D. W.: Quality control of wastewater for irrigated crop production FAO, Rome, 1997.  
650 Wiel-Shafran, A., Ronen, Z., Weisbrod, N., Adar, E., and Gross, A.: Potential changes in soil properties following irrigation  
651 with surfactant-rich greywater, *Ecological Engineering*, 26, 348-354, 2006.  
652 Xia, J. B., Xie, W. J., Sun, J. K., Liu, J. T., Liu, Q., and Lu, Z. H.: Effects of Paper-making Wastewater Irrigation on Reed Growth  
653 and Its Soil Improvement, *Journal of Soil & Water Conservation*, 25, 110-109, 2011.  
654 Xia, L. J. and Wang, H. K.: Soil pollution and countermeasures, Huazhong University of Science Press, Wuhan, 2001.  
655 Xu, G.: Effect of sewage irrigation with molasses alcohol wastewater on soil quality, 2007. Guangxi University, Nanning, 2007.  
656 Xue, Z. J.: Assessment of soil quality and pollution risk in main sewage-irrigated area of Hebei province, 2012. Agricultural  
657 University of Hebei Province, Baoding, 2012.  
658 Yang, J. F.: The Problem on Agricultural Sewage Irrigation and Countermeasures, *Water Resources Protection*, 2, 4-8, 2000.  
659 Yu, D.: Study on characteristics of soil phosphorus transport and transformation in the farmland with swine wastewater  
660 irrigation, 2009. Chinese Academy of Agricultural Sciences, Beijing, 2009.  
661 Zeng, D. F. and Zhu, W. B.: Discussion on problems of sewage irrigation and countermeasures in China, *Agricultural Research*  
662 *in the Arid Areas*, 22, 221-224, 2004.  
663 Zeng, X. B., Li, L. F., and Mei, X. R.: Heavy metal content in soils of vegetable-growing lands in China and source analysis,  
664 *Scientia Agricultura Sinica*, 40, 2507-2517, 2007.  
665 Zhang, D. G., Yi, Y. L., and Zheng, X. L.: Effect of Petroleum Groups on Soil and Rice in the Shen-Fu Irrigation Region, *Chinese*  
666 *Journal of Soil Science*, 34, 333-336, 2003.  
667 Zhang, J., Zhang, H. W., Su, Z. C., Li, X. Y., and Zhang, C. G.: The Effect of Long-term Organic Wastewater Irrigation on the Soil  
668 Nitrogen-fixing Bacteria Population, *Journal of Agro-Environment Science*, 26, 662-666, 2007.  
669 Zhang, J., Zhang, H. W., Zhang, Q., and Zhang, C. G.: Impact of long-time irrigation of petroleum wastewater on glebe  
670 microbial biomass and soil enzyme activities in Northeast China, *Chinese Journal of Eco-Agriculture*, 16, 67-70, 2008a.  
671 Zhang, J. Y. and Wang, G. Q.: The Impacts of Climate Change on Hydrology and Water Resources, Science Press, Beijing,  
672 2007.  
673 Zhang, L. H.: China's early exploration in sewage irrigation and pollution prevention(1949-1972), *Researches In Chinese*  
674 *Economic History*, 2, 153-165, 2014.  
675 Zhang, L. J., Huang, X. Q., Wu, F., and Wu, H. Q.: Study of Agricultural Tridimension Pollution on Irrigation Farmland and Its  
676 Control Tactics, *Journal of Irrigation & Drainage*, 24, 1-5, 2005.  
677 Zhang, M. K., Liu, L. J., and Huang, C.: Effects of Long-term Irrigation of Livestock Farm Wastewater on Soil Quality and  
678 Vegetable Quality in Vegetable Soils, *Journal of Soil & Water Conservation*, 25, 87-91, 2011.  
679 Zhang, W. L., Tian, Z. X., Zhang, N., and Li, X. Q.: Nitrate pollution of groundwater in northern China, *Agriculture Ecosystems*  
680 *& Environment*, 59, 223-231, 1996.  
681 Zhang, Y. L., Dai, J. L., and Wangab, R. Q.: Effects of long-term sewage irrigation on agricultural soil microbial structural and  
682 functional characterizations in Shandong, China, *European Journal of Soil Biology*, 44, 84-91, 2008b.  
683 Zhou, T.: Decision and technology of wastewater reuse, Chemical Industry Press Beijing, 2002.  
684
